# Supplementary material
Source: MDPI journal article supplement (https://www.mdpi.com/2073-4395/13/6/1454)
Supplement: s1 [file s1]

**Supplementary file for Karetnikov et al. “Assembly and Analysis of Plastomes for 15  
Potato Cultivars Grown in Russia”, Agronomy, 2023**

**Table S1.** The set of potato plastomes used in the study. Last column shows the reference number in the manuscript.

| <b>Species</b>                  | <b>Abbreviation/name</b> | <b>NCBI id</b> | <b>Ref.</b> |
|---------------------------------|--------------------------|----------------|-------------|
| <i>S. tuberosum andigenum</i>   | ADG1                     | MT120861       | [7]         |
| <i>S. tuberosum andigenum</i>   | ADG2                     | MT120862       | [7]         |
| <i>S. ahanhuii</i>              | AJH                      | MT120857       | [7]         |
| <i>S. bukasovii</i>             | BUK1                     | MT120860       | [7]         |
| <i>S. bukasovii</i>             | BUK2                     | MT120867       | [7]         |
| <i>S. chaucha</i>               | CHA                      | MT120864       | [7]         |
| <i>S. curtilobum</i>            | CUR                      | MT120866       | [7]         |
| <i>S. stenotomum goniocalyx</i> | GON1                     | MT120855       | [7]         |
| <i>S. stenotomum goniocalyx</i> | GON2                     | MT120856       | [7]         |
| <i>S. juzupczukii</i>           | JUZ                      | MT120863       | [7]         |
| <i>S. phureja</i>               | PHU                      | MT120858       | [7]         |
| <i>S. stenotomum stenotomum</i> | STN                      | MT120859       | [7]         |
| <i>S. tuberosum</i>             | TBR                      | MT120865       | [7]         |
| <i>S. tuberosum</i>             | Atlantic                 | MZ030720       | [24]        |
| <i>S. tuberosum</i>             | Colomba                  | MZ030723       | [24]        |
| <i>S. tuberosum</i>             | Altus                    | MZ030719       | [24]        |
| <i>S. tuberosum</i>             | Avenger                  | MZ030721       | [24]        |
| <i>S. tuberosum</i>             | Castle Russet            | MZ030722       | [24]        |
| <i>S. tuberosum</i>             | Spunta                   | MZ030724       | [24]        |
| <i>S. chacoense</i>             | 15-27-1                  | -              | [23]        |
| <i>S. chacoense</i>             | Legenda                  | -              | [23]        |
| <i>S. tuberosum</i>             | Shah                     | -              | [23]        |
| <i>S. tuberosum</i>             | Argo                     | -              | [23]        |
| <i>S. tuberosum</i>             | Alaska                   | -              | [23]        |

**Table S1.** Continued.

| <b>Species</b>      | <b>Abbreviation/name</b> | <b>NCBI id</b> | <b>Ref.</b> |
|---------------------|--------------------------|----------------|-------------|
| <i>S. tuberosum</i> | Mishka                   | -              | [23]        |
| <i>S. tuberosum</i> | 14_6_3                   | -              | [23]        |
| <i>S. tuberosum</i> | 16_4_3                   | -              | [23]        |
| <i>S. tuberosum</i> | Bankir                   | -              | [23]        |
| <i>S. tuberosum</i> | 12_22_134                | -              | [23]        |
| <i>S. tuberosum</i> | 15_22_4                  | -              | [23]        |
| <i>S. tuberosum</i> | 14_4_1                   | -              | [23]        |
| <i>S. tuberosum</i> | 16_1_2                   | -              | [23]        |
| <i>S. tuberosum</i> | 16-35-5                  | -              | [23]        |
| <i>S. tuberosum</i> | Zdraven                  | -              | [23]        |
| <i>S. tuberosum</i> | Utro ranneye             | -              | [23]        |
| <i>S. tuberosum</i> | Iskra                    | -              | [23]        |
| <i>S. tuberosum</i> | Gornyak                  | -              | [23]        |
| <i>S. tuberosum</i> | Otrada                   | -              | [23]        |
| <i>S. tuberosum</i> | Start                    | -              | [23]        |
| <i>S. tuberosum</i> | Terra                    | -              | [23]        |
| <i>S. tuberosum</i> | Amur                     | -              | [23]        |
| <i>S. tuberosum</i> | Bravo                    | -              | [23]        |
| <i>S. tuberosum</i> | Bagira                   | -              | [23]        |
| <i>S. tuberosum</i> | Baron                    | -              | [23]        |
| <i>S. tuberosum</i> | Kamenskiy                | -              | [23]        |
| <i>S. tuberosum</i> | Irbitskiy                | -              | [23]        |
| <i>S. tuberosum</i> | Luks                     | -              | [23]        |

**Table S2.** Microsatellite numbers for 15 potato cultivars grown in Russia of *S. tuberosum*.

| <b>Cultivar</b>  | <b>mono</b> | <b>di</b> | <b>tri</b> | <b>tetra</b> | <b>penta</b> |
|------------------|-------------|-----------|------------|--------------|--------------|
| Fritella         | 38          | 6         | 2          | 8            | 1            |
| Golubizna        | 36          | 6         | 2          | 8            | 1            |
| Grand            | 39          | 6         | 2          | 8            | 1            |
| Gusar            | 39          | 6         | 2          | 8            | 1            |
| Krasa Meshchery  | 38          | 6         | 2          | 8            | 1            |
| Krasavchik       | 36          | 6         | 2          | 8            | 1            |
| Krepysh          | 38          | 6         | 2          | 8            | 1            |
| Meteor           | 39          | 6         | 2          | 8            | 1            |
| Nevsky           | 38          | 6         | 2          | 8            | 1            |
| Nikulinsky       | 36          | 6         | 2          | 8            | 1            |
| Severnoe siyanie | 36          | 6         | 2          | 8            | 1            |
| Sudarinya        | 39          | 6         | 2          | 8            | 1            |
| Symphonia        | 36          | 6         | 2          | 8            | 1            |
| Udacha           | 38          | 6         | 2          | 8            | 1            |
| Zhukovsky        | 38          | 6         | 2          | 8            | 1            |

**Table S3.** Microsatellite sequences identified in plastomes of 15 potato cultivars grown in Russia.

| <b>Cultivar</b>  | <b>A</b> | <b>T</b> | <b>AT</b> | <b>TA</b> | <b>AAG</b> | <b>TTA</b> | <b>AAAC</b> | <b>TATT</b> | <b>TTAT</b> | <b>TTTA</b> | <b>TTTG</b> | <b>CTAT</b> | <b>CAAA</b> | <b>AATTG</b> |
|------------------|----------|----------|-----------|-----------|------------|------------|-------------|-------------|-------------|-------------|-------------|-------------|-------------|--------------|
| Fritella         | 15       | 23       | 3         | 3         | 1          | 1          | 1           | 1           | 1           | 1           | 1           | 2           | 1           | 1            |
| Golubizna        | 14       | 22       | 3         | 3         | 1          | 1          | 1           | 1           | 1           | 1           | 1           | 2           | 1           | 1            |
| Grand            | 15       | 24       | 3         | 3         | 1          | 1          | 1           | 1           | 1           | 1           | 1           | 2           | 1           | 1            |
| Gusar            | 15       | 24       | 3         | 3         | 1          | 1          | 1           | 1           | 1           | 1           | 1           | 2           | 1           | 1            |
| Krasa Meshchery  | 15       | 23       | 3         | 3         | 1          | 1          | 1           | 1           | 1           | 1           | 1           | 2           | 1           | 1            |
| Krasavchik       | 14       | 22       | 3         | 3         | 1          | 1          | 1           | 1           | 1           | 1           | 1           | 2           | 1           | 1            |
| Krepysh          | 15       | 23       | 3         | 3         | 1          | 1          | 1           | 1           | 1           | 1           | 1           | 2           | 1           | 1            |
| Meteor           | 15       | 24       | 3         | 3         | 1          | 1          | 1           | 1           | 1           | 1           | 1           | 2           | 1           | 1            |
| Nevsky           | 15       | 23       | 3         | 3         | 1          | 1          | 1           | 1           | 1           | 1           | 1           | 2           | 1           | 1            |
| Nikulinsky       | 14       | 22       | 3         | 3         | 1          | 1          | 1           | 1           | 1           | 1           | 1           | 2           | 1           | 1            |
| Severnoe siyanie | 14       | 22       | 3         | 3         | 1          | 1          | 1           | 1           | 1           | 1           | 1           | 2           | 1           | 1            |
| Sudarinya        | 15       | 24       | 3         | 3         | 1          | 1          | 1           | 1           | 1           | 1           | 1           | 2           | 1           | 1            |
| Symphonia        | 14       | 22       | 3         | 3         | 1          | 1          | 1           | 1           | 1           | 1           | 1           | 2           | 1           | 1            |
| Udacha           | 15       | 23       | 3         | 3         | 1          | 1          | 1           | 1           | 1           | 1           | 1           | 2           | 1           | 1            |
| Zhukovsky        | 15       | 23       | 3         | 3         | 1          | 1          | 1           | 1           | 1           | 1           | 1           | 2           | 1           | 1            |

**Table S4.** Fragment sizes in bp revealed after restriction analysis *in silico* by five enzymes for 15 potato cultivars grown in Russia.

| <b>Cultivar</b>     | <b><i>Bam</i>HI</b> | <b><i>Hind</i>III</b> | <b><i>Kpn</i>I</b> | <b><i>Pvu</i>II</b> | <b><i>Xho</i>I</b> | <b>Type</b> |
|---------------------|---------------------|-----------------------|--------------------|---------------------|--------------------|-------------|
| Golubizna           | 12,206              | 11,757                | 6,222              | 9,853               | 8,153              | T           |
| Krasavchik          | 12,206              | 11,757                | 6,222              | 9,853               | 8,153              | T           |
| Nikulinsky          | 12,206              | 11,757                | 6,222              | 9,853               | 8,153              | T           |
| Severnoe<br>siyanie | 12,206              | 11,757                | 6,222              | 9,853               | 8,153              | T           |
| Symphonia           | 12,206              | 11,757                | 6,222              | 9,853               | 8,153              | T           |
| Fritella            | 15,605              | -                     | -                  | -                   | -                  | W           |
| Grand               | 15,605              | -                     | -                  | -                   | -                  | W           |
| Gusar               | 15,605              | -                     | -                  | -                   | -                  | W           |
| Krasa<br>Meshchery  | 15,605              | -                     | -                  | -                   | -                  | W           |
| Krepysh             | 15,605              | -                     | -                  | -                   | -                  | W           |
| Meteor              | 15,605              | -                     | -                  | -                   | -                  | W           |
| Nevsky              | 15,605              | -                     | -                  | -                   | -                  | W           |
| Sudarinya           | 15,605              | -                     | -                  | -                   | -                  | W           |
| Udacha              | 15,605              | -                     | -                  | -                   | -                  | W           |
| Zhukovsky           | 15,605              | -                     | -                  | -                   | -                  | W           |

## Inverted Repeats

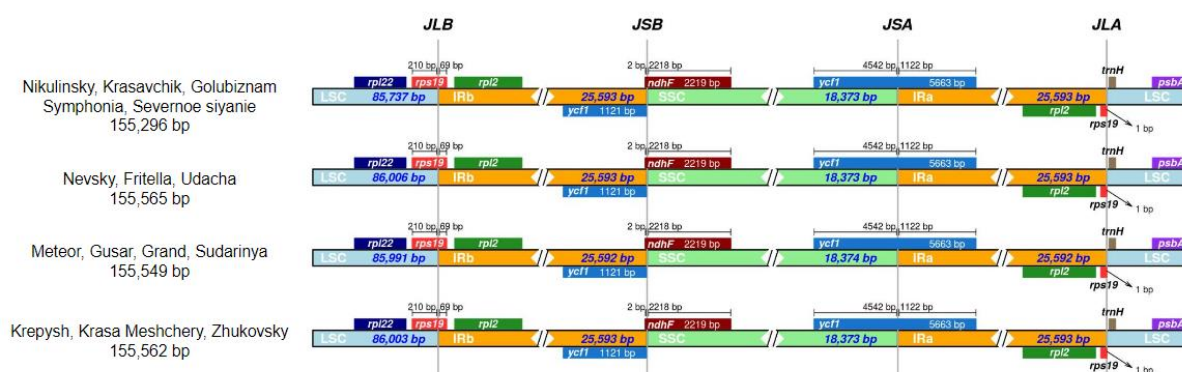

**Figure S1.** Visualization of junction-sites in plastomes of the 15 potato cultivars grown in Russia (JLB, JLA, JSA, JSB). The size of the plastomes indicated on the left under the cultivar names.

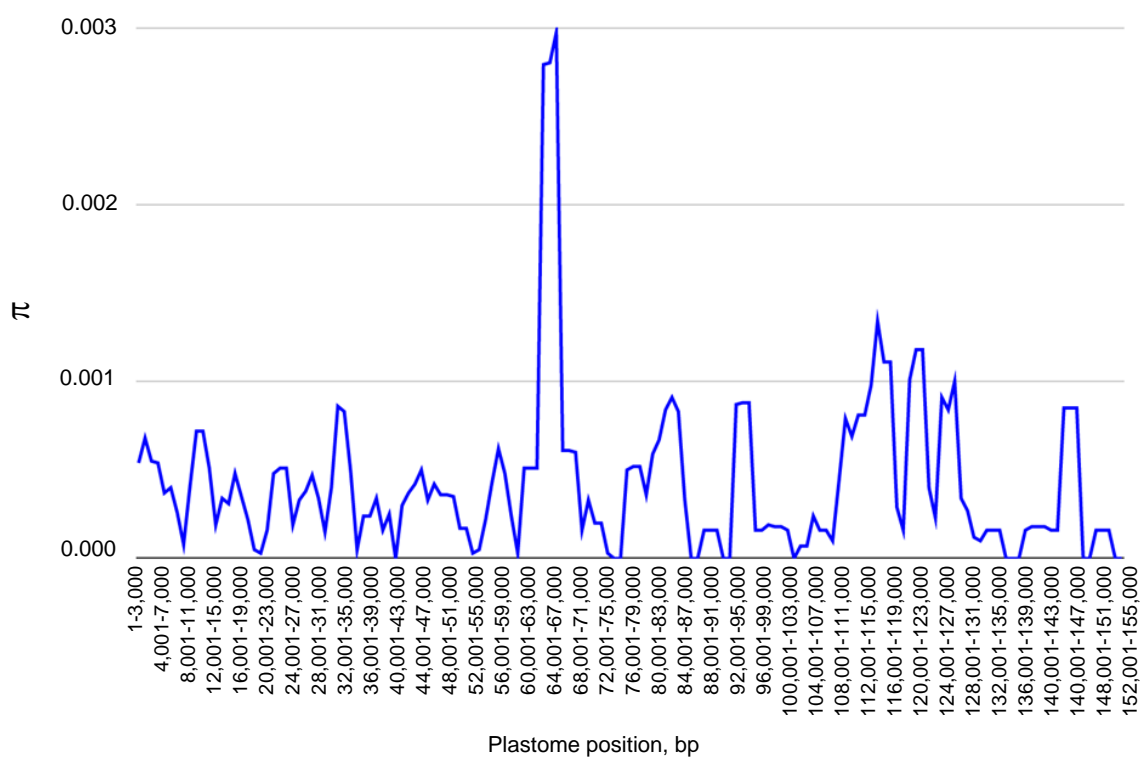

**Figure S2.** Distribution of nucleotide diversity in plastomes of 49 *S. tuberosum* cultivars. The X-axis shows the coordinates of the plastome multiple sequence alignment. The Y-axis shows the nucleotide diversity,  $\pi$ .

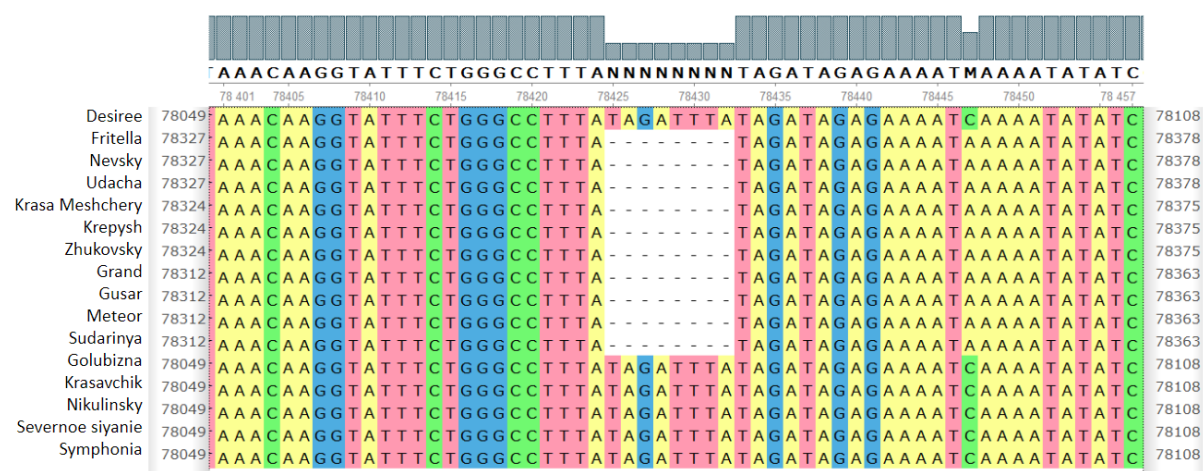

**Figure S3.** Fragment of alignment of plastome sequences of 15 potato cultivars grown in Russia. The alignment demonstrates a deletion in a number of plastomes, which affects part of the exon of the gene *petB*.
